- ischaemic left ventricular failure in dogs. *Scand J Clin Lab Invest* 1985;45:515–20
13. Paulson DJ, Traxler J, Schmidt M, Noonan J, Shug AL. Protection of the ischaemic myocardium by L-propionylcarnitine: Effects on the recovery of cardiac output after ischaemia and reperfusion, carnitine transport, and fatty acid oxidation. *Cardiovasc Res* 1986;20:536–41
  14. Montessuit C, Papageorgiou I, Tardy-Cantalupi I, Rosenblatt-Velin N, Lerch R. Postischemic recovery of heart metabolism and function: Role of mitochondrial fatty acid transfer. *J Appl Physiol* 2000;89:111–9
  15. Lou PH, Zhang L, Lucchinetti E, Heck M, Affolter A, Gandhi M, Kienesberger PC, Hersberger M, Clanachan AS, Zaugg M: Infarct-remodelled hearts with limited oxidative capacity boost fatty acid oxidation after conditioning against ischaemia/reperfusion injury. *Cardiovasc Res* 2013; 97: 251–61
  16. McFalls EO, Ward HB, Fashingbauer P, Palmer B. Effects of dobutamine stimulation on regional myocardial glucose uptake poststunning as measured by positron emission tomography. *Cardiovasc Res* 1994;28:1030–35
  17. Liedtke AJ, Nellis SH. Effects of carnitine in ischemic and fatty acid supplemented swine hearts. *J Clin Invest* 1979;64: 440–7
  18. Folts JD, Shug AL, Koke JR, Bittar N. Protection of the ischemic dog myocardium with carnitine. *Am J Cardiol* 1978;41:1209–14
  19. Kawaraguchi Y, Roth DM, Patel HH. From local to global: Lipid emulsion (intralipid) makes a move. *ANESTHESIOLOGY* 2011;115:226–8
  20. Bopassa JC, Ferrera R, Gateau-Roesch O, Couture-Lepetit E, Ovize M. PI 3-kinase regulates the mitochondrial transition pore in controlled reperfusion and postconditioning. *Cardiovasc Res* 2006;69:178–85

(Accepted for publication January 29, 2013.)

## Desflurane, Isoflurane, and...Ragweed

### To the Editor:

Recent discoveries in the mechanism of action of ragweed sensitivity may have a bearing on the choice of anesthetic agent. We review some pathways that affect bronchial motor tone and how they may influence the choice of anesthetic agent. Bronchial motor tone is regulated by the parasympathetic nervous system, which exerts a contractile action through activation of  $M_3$  receptors, and by the nonadrenergic noncholinergic pathways having both inhibitory and excitatory effects. The bronchial response to stimulation is in part due to C-fibers in the bronchial wall that are responsible for a local axon reflex, with irritant stimulation of nerve endings leading to the release of bronchoconstricting tachykinins such as substance P, neurokinin A, and calcitonin gene-related peptide.<sup>1,2</sup> While sevoflurane does not induce increased airway resistance, desflurane-elicited airway constriction appears to be mediated by the release of these tachykinins.<sup>3</sup>

The transient receptor potential (TRP) family of cation channels is highly expressed by a subset of C-fiber nociceptors, including those in the lung.<sup>4,5</sup> TRPA1 is expressed in sensory neurons, and colocalizes with TRPV1, calcitonin

gene-related peptide, substance P, and bradykinin receptors.<sup>6</sup> TRPA1 is activated by the pungent ingredients in mustard and garlic extracts, allyl isothiocyanate<sup>7</sup> and alliin.<sup>8</sup> Sensory neurons from TRPA1-deficient mice show greatly diminished responses to each of these compounds, demonstrating that the TRPA1 channel is the primary molecular site by which they activate the irritant and pain pathway,<sup>9,10</sup> as well as initiate the asthmatic airway inflammation.<sup>11</sup> TRPA1 receptors are activated by desflurane and isoflurane,<sup>3,7,12</sup> similar to the effects of several air pollutants and chemicals that cause airway constriction, such as  $\alpha\beta$ -unsaturated aldehydes and acrolein that activate the axon reflex release of tachykinins.<sup>8,13</sup>

It has been recently reported that the TRPA1 receptor is also activated by the sesquiterpenoids present in the pollen from common ragweed (*Ambrosia artemisiifolia*), and activation of this receptor may contribute to the various respiratory symptoms caused by inhalation of this pollen.<sup>14</sup> The sensitivity of a patient to ragweed suggests enhanced response of the TRPA1-activated tachykinin pathway. This sensitivity may have implications for anesthetic choice in patients with allergy to ragweed and possibly other pollens. Activation of TRPA1 by desflurane and isoflurane may be more likely in this setting of heightened sensitivity, leading to increased airway resistance and decreased lung compliance<sup>15</sup> as well as causing bronchospasm and cough.<sup>16,17</sup> These effects may in part be counteracted by volatile anesthetics' ability to directly relax airway smooth muscle<sup>18</sup> and by desensitization of the TRPA1 receptor during sustained exposure.<sup>19</sup> Nevertheless, the activation of TRPA1 receptors in the upper airway has been suggested to be in part responsible for the clinical observation of cough and laryngospasm due to desflurane.<sup>3,4,13</sup>

The role of TRPA1 receptor in irritant-induced cough and increased airway resistance and their stimulation by desflurane and isoflurane could account for some of the clinical side effects of these drugs. Clinicians may want to take these findings into consideration when choosing an anesthetic for their patients. The lack of stimulation of TRPA1 receptors by sevoflurane<sup>3,12</sup> may explain its relative lack of irritation<sup>16,17</sup> and make it a less irritating choice in patients who have demonstrated heightened airway sensitivity to ragweed pollen or other chemical irritants.

**Mohamed Tiouririne, M.D.,\* Carl Lynch III, M.D., Ph.D.** \*University of Virginia, Charlottesville, Virginia. [mt9y@virginia.edu](mailto:mt9y@virginia.edu)

### References

1. Canning BJ: Reflex regulation of airway smooth muscle tone. *J Appl Physiol* 2006; 101:971–85
2. Lamb JP, Sparrow MP: Three-dimensional mapping of sensory innervation with substance P in porcine bronchial mucosa: Comparison with human airways. *Am J Respir Crit Care Med* 2002; 166:1269–81
3. Satoh J, Yamakage M: Desflurane induces airway contraction mainly by activating transient receptor potential A1 of sensory C-fibers. *J Anesth* 2009; 23:620–3

4. Nassenstein C, Kwong K, Taylor-Clark T, Kollarik M, Macglashan DM, Braun A, Undem BJ: Expression and function of the ion channel TRPA1 in vagal afferent nerves innervating mouse lungs. *J Physiol (Lond)* 2008; 586:1595–604
5. Banner KH, Igney F, Poll C: TRP channels: Emerging targets for respiratory disease. *Pharmacol Ther* 2011; 130:371–84
6. Chen J, Joshi SK, DiDomenico S, Perner RJ, Mikusa JP, Gauvin DM, Segreti JA, Han P, Zhang XF, Niforatos W, Bianchi BR, Baker SJ, Zhong C, Simler GH, McDonald HA, Schmidt RG, McGaraughty SP, Chu KL, Faltynek CR, Kort ME, Reilly RM, Kym PR: Selective blockade of TRPA1 channel attenuates pathological pain without altering noxious cold sensation or body temperature regulation. *Pain* 2011; 152:1165–72
7. Eilers H, Cattaruzza F, Nassini R, Materazzi S, Andre E, Chu C, Cottrell GS, Schumacher M, Geppetti P, Bunnett NW: Pungent general anesthetics activate transient receptor potential-A1 to produce hyperalgesia and neurogenic bronchoconstriction. *ANESTHESIOLOGY* 2010; 112:1452–63
8. Bautista DM, Jordt SE, Nikai T, Tsuruda PR, Read AJ, Poblete J, Yamoah EN, Basbaum AI, Julius D: TRPA1 mediates the inflammatory actions of environmental irritants and proalgesic agents. *Cell* 2006; 124:1269–82
9. Kwan KY, Allchorne AJ, Vollrath MA, Christensen AP, Zhang DS, Woolf CJ, Corey DP: TRPA1 contributes to cold, mechanical, and chemical nociception but is not essential for hair-cell transduction. *Neuron* 2006; 50:277–89
10. McNamara CR, Mandel-Brehm J, Bautista DM, Siemens J, Deranian KL, Zhao M, Hayward NJ, Chong JA, Julius D, Moran MM, Fanger CM: TRPA1 mediates formalin-induced pain. *Proc Natl Acad Sci USA* 2007; 104:13525–30
11. Caceres AI, Brackmann M, Elia MD, Bessac BF, del Camino D, D'Amours M, Witek JS, Fanger CM, Chong JA, Hayward NJ, Homer RJ, Cohn L, Huang X, Moran MM, Jordt SE: A sensory neuronal ion channel essential for airway inflammation and hyperreactivity in asthma. *Proc Natl Acad Sci USA* 2009; 106:9099–104
12. Matta JA, Cornett PM, Miyares RL, Abe K, Sahibzada N, Ahern GP: General anesthetics activate a nociceptive ion channel to enhance pain and inflammation. *Proc Natl Acad Sci USA* 2008; 105:8784–9
13. Geppetti P, Patacchini R, Nassini R, Materazzi S: Cough: The emerging role of the TRPA1 channel. *Lung* 2010; 188(suppl 1):S63–8
14. Taglialatela-Scafati O, Pollastro F, Minassi A, Chianese G, De Petrocellis L, Di Marzo V, Appendino G: Sesquiterpenoids from common ragweed (*Ambrosia artemisiifolia* L.), an invasive biological pollutant. *Eur J Org Chem* 2012; 2012:5162–70
15. von Ungern-Sternberg BS, Saudan S, Petak F, Hantos Z, Habre W: Desflurane but not sevoflurane impairs airway and respiratory tissue mechanics in children with susceptible airways. *ANESTHESIOLOGY* 2008; 108:216–24
16. Klock PA Jr, Czeslick EG, Klapf JM, Ovassapian A, Moss J: The effect of sevoflurane and desflurane on upper airway reactivity. *ANESTHESIOLOGY* 2001; 94:963–7
17. Arain SR, Shankar H, Ebert TJ: Desflurane enhances reactivity during the use of the laryngeal mask airway. *ANESTHESIOLOGY* 2005; 103:495–9
18. Mazzeo AJ, Cheng EY, Bosnjak ZJ, Coon RL, Kampine JP: Differential effects of desflurane and halothane on peripheral airway smooth muscle. *Br J Anaesth* 1996; 76:841–6
19. Raisinghani M, Zhong L, Jeffry JA, Bishnoi M, Pabbidi RM, Pimentel F, Cao D-S, Evans MS, Premkumar LS: Activation characteristics of transient receptor potential ankyrin 1 and its role in nociception. *Am J Physiol Cell Physiol* 2011; 301:C587–600

(Accepted for publication February 8, 2013.)
